# Supplementary material for: Macrophage-Secreted CSF1 Transmits a Calorie Restriction-Induced Self-Renewal Signal to Mammary Epithelial Stem Cells
Source: MDPI journal article supplement (doi:10.3390/cells11182923), 2022-09-19
Supplement: s1 [file s1]

**Table S1.** Antibodies and recombinant protein used in this study.

| Antigen                      | Primary antibody                            | Manufacturer                                | Dilution           | Application              | Secondary antibody                                                           | Manufacturer                                                                              | Dilution         |
|------------------------------|---------------------------------------------|---------------------------------------------|--------------------|--------------------------|------------------------------------------------------------------------------|-------------------------------------------------------------------------------------------|------------------|
| CSF1                         | Mouse monoclonal                            | Santa Cruz Biotechnology<br>Santa Cruz, CA  | 1:100              | IHC<br><br>IF            | Histofine,<br>H1906-1<br><br>Cy3-conjugated donkey anti-mouse IgG            | NICHIREI BIOSCIENCES INC.<br>Tokyo, Japan<br><br>Jackson ImmunoResearch<br>West Grove, PA | 1:100            |
| CSF1R                        | Mouse monoclonal                            | Santa Cruz Biotechnology                    | 1:100              | IHC<br><br>IF            | Histofine,<br>H1906-1<br><br>Cy3-conjugated donkey anti-mouse IgG            | NICHIREI BIOSCIENCES INC.<br><br>Jackson ImmunoResearch                                   | 1:100            |
| CD19                         | Rabbit polyclonal                           | GeneTex<br>Hsinchu City, Taiwan, R.O.C      | 1:50               | IF                       | Alexa Fluor 488-conjugated goat anti-rabbit IgG                              | Jackson ImmunoResearch                                                                    | 1:400            |
| CD3                          | Mouse monoclonal                            | GeneTex                                     | 1:100              | IF                       | Cy3-conjugated donkey anti-mouse IgG                                         | Jackson ImmunoResearch                                                                    | 1:100            |
| CD24                         | PE-conjugated, Rat monoclonal, clone M1/69  | Biolegend<br>San Diego, CA                  | 1:33               | Flow Cytometry           | N/A                                                                          | N/A                                                                                       | N/A              |
| CD49                         | FITC-conjugated, Rat monoclonal, Clone GoH3 | StemCell Technologies,<br>Vancouver, Canada | 1:33               | Flow Cytometry           | N/A                                                                          | N/A                                                                                       | N/A              |
| CD14                         | FITC-conjugated, Mouse monoclonal           | Invitrogen<br>Carlsbad, CA                  | 1:150<br><br>1:100 | Flow Cytometry<br><br>IF | N/A<br><br>Cy3-conjugated donkey anti-mouse IgG                              | N/A<br><br>Jackson ImmunoResearch                                                         | N/A<br><br>1:100 |
| F4/80                        | Rabbit monoclonal                           | Cell signaling Inc.<br>Danvers, MA          | 1:200<br><br>1:100 | IHC<br><br>IF            | Histofine,<br>H1906-1<br><br>Alexa Fluor 488-conjugated goat anti-rabbit IgG | <br><br>Jackson ImmunoResearch                                                            | 1:400            |
| Stat1                        | Rabbit monoclonal                           | Invitrogen                                  | 1:50               | IF                       | Alexa Fluor 488-conjugated goat anti-rabbit IgG                              | Jackson ImmunoResearch                                                                    | 1:400            |
| Stat6                        | Rabbit monoclonal                           | Invitrogen                                  | 1:50               | IF                       | Alexa Fluor 488-conjugated goat anti-rabbit IgG                              | Jackson ImmunoResearch                                                                    | 1:400            |
| M-CSFR Neutralizing antibody | Rat monoclonal, clone AFS98                 | GeneTex                                     | 0.1 mg /ml         | Inhibition               | N/A                                                                          | N/A                                                                                       | N/A              |
| M-CSF1 (Recombinant)         |                                             | Biolegend                                   | 0.2 mg /ml         | Expression               | N/A                                                                          | N/A                                                                                       | N/A              |

IHC – immunohistochemistry, IF – immunofluorescence, N/A – not applicable
